# Supplementary material for: In vivo administration of gut bacterial consortia replicates urolithin metabotypes A and B in a non-urolithin-producing rat model
Source: Royal Society of Chemistry journal article supplement (doi:10.1039/d2fo03957e), 2023-01-01
Supplement: d2fo03957e1.pdf [file d2fo03957e1.pdf]

## Supporting Data

**Table 1S.** Specificity of *Ellagibacter* primers and probe.

| Cepa                                                                | Name                                              | EMBL                    | Matches     |       |         | qPCR Test |          |
|---------------------------------------------------------------------|---------------------------------------------------|-------------------------|-------------|-------|---------|-----------|----------|
|                                                                     |                                                   |                         | Forward     | Probe | Reverse |           |          |
| <b><u>Ellagibacter</u></b>                                          |                                                   |                         |             |       |         |           |          |
|                                                                     | <i>Ellagibacter isourolithinifaciens</i>          | DSM 104140 <sup>T</sup> | MF322780.1  | 0     | 0       | 0         | positive |
| <b><u>Neighbours of Ellagibacter</u></b>                            |                                                   |                         |             |       |         |           |          |
|                                                                     | <i>Senegalimassilia anaerobia</i>                 | DSM 25959 <sup>T</sup>  | JF824809    | 4     | 7       | 0         | negative |
|                                                                     | <i>Adlercreutzia equolifaciens subsp. celatus</i> | DSM18785 <sup>T</sup>   | AB266102    | 4     | 6       | 0         | negative |
|                                                                     | <i>Adlercreutzia equolifaciens</i>                | DSM 19450 <sup>T</sup>  | AB306661.1  | 4     | 6       | 0         | negative |
|                                                                     | <i>Adlercreutzia equolifaciens</i>                | FJC-B9 <sup>T</sup>     | AB306661    | 4     | 6       | 0         | negative |
|                                                                     | <i>Adlercreutzia mucosicola</i>                   | DSM 19490 <sup>T</sup>  | AM747811.2  | 4     | 6       | 0         | negative |
|                                                                     | <i>Adlercreutzia caecicola</i>                    | DSM 22242 <sup>T</sup>  | GQ456228.2  | 4     | 6       | 0         | negative |
|                                                                     | <i>Adlercreutzia caecimuris</i>                   | DSM 21839 <sup>T</sup>  | DQ789120    | 4     | 6       | 0         | ND       |
|                                                                     | <i>Slackia isoflavoniconvertens</i>               | DSM 22006 <sup>T</sup>  | EU826403    | 4     | 7       | 0         | negative |
|                                                                     | <i>Slackia heliotrinireducens</i>                 | DSM 20476 <sup>T</sup>  | AF101241    | 4     | 7       | 0         | negative |
|                                                                     | <i>Denitrobacterium detoxificans</i>              | DSM21843 <sup>T</sup>   | U43492      | 5     | 7       | 0         | ND       |
|                                                                     | <i>Cryptobacterium curtum</i>                     | DSM 15641 <sup>T</sup>  | NR074425    | 5     | 5       | 0         | ND       |
|                                                                     | <i>Raoultibacter massiliensis</i>                 | DSM 103407 <sup>T</sup> | LT576395.1  | 4     | 7       | 0         | ND       |
|                                                                     | <i>Gordonibacter pamelaeeae</i>                   | DSM 19378 <sup>T</sup>  | NR_102934.1 | 4     | 7       | 0         | negative |
|                                                                     | <i>Gordonibacter pamelaeeae</i>                   | ARC-1                   | EF413639    | 4     | 7       | 0         | negative |
|                                                                     | <i>Gordonibacter urolithinifaciens</i>            | DSM 27213 <sup>T</sup>  | HG000667    | 4     | 7       | 0         | negative |
|                                                                     | <i>Gordonibacter urolithinifaciens</i>            | CEBAS 19P               |             | 4     | 7       | 0         | negative |
|                                                                     | <i>Gordonibacter urolithinifaciens</i>            | CEBAS 107P              |             | 4     | 7       | 0         | negative |
|                                                                     | <i>Eggerthella lenta</i>                          | DSM 2243 <sup>T</sup>   | AF292375    | 5     | 7       | 0         | negative |
|                                                                     | <i>Eggerthella sinensis</i>                       | DSM 16107 <sup>T</sup>  | AY321958    | 3     | 7       | 0         | negative |
|                                                                     | <i>Paraeggerthella hongkongensis</i>              | DSM 16106 <sup>T</sup>  | AY288517    | 3     | 7       | 0         | negative |
| <b><u>Other representative species commonly found in faeces</u></b> |                                                   |                         |             |       |         |           |          |
|                                                                     | <i>Blautia coccooides</i>                         | DSM 935 <sup>T</sup>    | M59090      | >6    | >6      | >6        | negative |
|                                                                     | <i>Clostridium leptum</i>                         | DSM 935 <sup>T</sup>    | AJ305238    | >6    | >6      | >6        | negative |
|                                                                     | <i>Bacteroides ovatus</i>                         | DSM 1896 <sup>T</sup>   | X83952      | >6    | >6      | >6        | negative |
|                                                                     | <i>Lactobacillus plantarum</i>                    | CECT 748 <sup>T</sup>   | D79210      | >6    | >6      | >6        | negative |
|                                                                     | <i>Escherichia coli</i>                           | CECT 515 <sup>T</sup>   | AB681728    | >6    | >6      | >6        | negative |
|                                                                     | <i>Bifidobacterium longum</i>                     | DSM 20088 <sup>T</sup>  | M58739      | >6    | >6      | >6        | negative |
|                                                                     | <i>Salmonella enterica</i>                        | DSM 17058 <sup>T</sup>  | AE006468    | >6    | >6      | >6        | negative |

**Table 2S.** Specificity of *Enterocloster* primers and probe.

| Strain                                                              | Name                   | EMBL               | Matches |       |         | qPCR Test |
|---------------------------------------------------------------------|------------------------|--------------------|---------|-------|---------|-----------|
|                                                                     |                        |                    | Forward | Probe | Reverse |           |
| <b><u>Enterocloster</u></b>                                         |                        |                    |         |       |         |           |
| <i>Enterocloster asparagiformis</i>                                 | DSM 15981T             | NR_042200.1        | 20      | 24    | 20      | Positive  |
| <i>Enterocloster bolteae</i>                                        | DSM 15670T             | CP022464.2         | 20      | 24    | 20      | Positive  |
| <i>Enterocloster citroniae</i>                                      | DSM 19261T             | NR_043681.1        | 20      | 24    | 20      | Positive  |
| <i>Enterocloster clostidioformis</i>                                | DSM 933T               | <u>NR_044715.2</u> | 20      | 24    | 20      | Positive  |
| <i>Enterocloster aldenensis</i>                                     | DSM 19262T             | <u>NR_043680.1</u> | 20      | 24    | 20      | Positive  |
| <i>Enterocloster lavalense</i>                                      | CCRI-9842              | <u>NR_044289.1</u> | 20      | 24    | 20      | Positive  |
| <b><u>Neighbours of Enterocloster</u></b>                           |                        |                    |         |       |         |           |
| <i>Lacrimispora indolis</i>                                         | DSM 755T               | <u>HM245946.1</u>  | 18      | 22    | 13      | Negative  |
| <i>Lacrimispora sphenoides</i>                                      | DSMZ 4024              | <u>LT630003.1</u>  | 13      | 22    | 16      | Negative  |
| <i>Lacrimispora aerotolerans</i>                                    | DSM 5434T              | NR_119068.1        | 18      | 22    | 13      | Negative  |
| <i>Blautia coccooides</i>                                           | DSM 935T               | CP022713.1         | 18      | 22    | 16      | Negative  |
| <i>Blautia producta</i>                                             | DSM 2950T              | <u>CP048626.1</u>  | 18      | 22    | 16      | Negative  |
| <b><u>Other representative species commonly found in faeces</u></b> |                        |                    |         |       |         |           |
| <i>Gordonibacter urolithinifaciens</i>                              | DSM 27213T             | <u>LT900217.1</u>  | 12      | 13    | 12      | Negative  |
| <i>Eggerthella lenta</i>                                            | DSM 2243T              | <u>CP001726.1</u>  | 12      | 15    | 11      | Negative  |
| <i>Eggerthella sinensis</i>                                         | DSM 16107T             | <u>NR_042840.1</u> | 11      | 11    | 7       | Negative  |
| <i>Paraeggerthella hongkongensis</i>                                | DSM 166106T            | <u>NR_042825.1</u> | 11      | 11    | 7       | Negative  |
| <i>Clostridium leptum</i>                                           | DSM 735 <sup>T</sup>   | NR_114789.1        | 13      | 7     | 12      | Negative  |
| <i>Bacteroides ovatus</i>                                           | DSM 1896 <sup>T</sup>  | CP012938.1         | 14      | 13    | 12      | Negative  |
| <i>Lactobacillus plantarum</i>                                      | CECT 748 <sup>T</sup>  | CP039121.1         | 17      | 12    | 13      | Negative  |
| <i>Escherichia coli</i>                                             | CECT 515 <sup>T</sup>  | AB681728           | <6      | <6    | <6      | Negative  |
| <i>Bifidobacterium longum</i>                                       | DSM 20088 <sup>T</sup> | M58739             | <6      | <6    | <6      | Negative  |
| <i>Salmonella enterica</i>                                          | DSM 17058 <sup>T</sup> | AE006468           | <6      | <6    | <6      | Negative  |
